# Supplementary material
Source: PubMed Central journal article supplement (PMC3443514)
Supplement: NIHMS377550-supplement-01.pdf [file NIHMS377550-supplement-01.pdf]

# Supplemental Figure 1

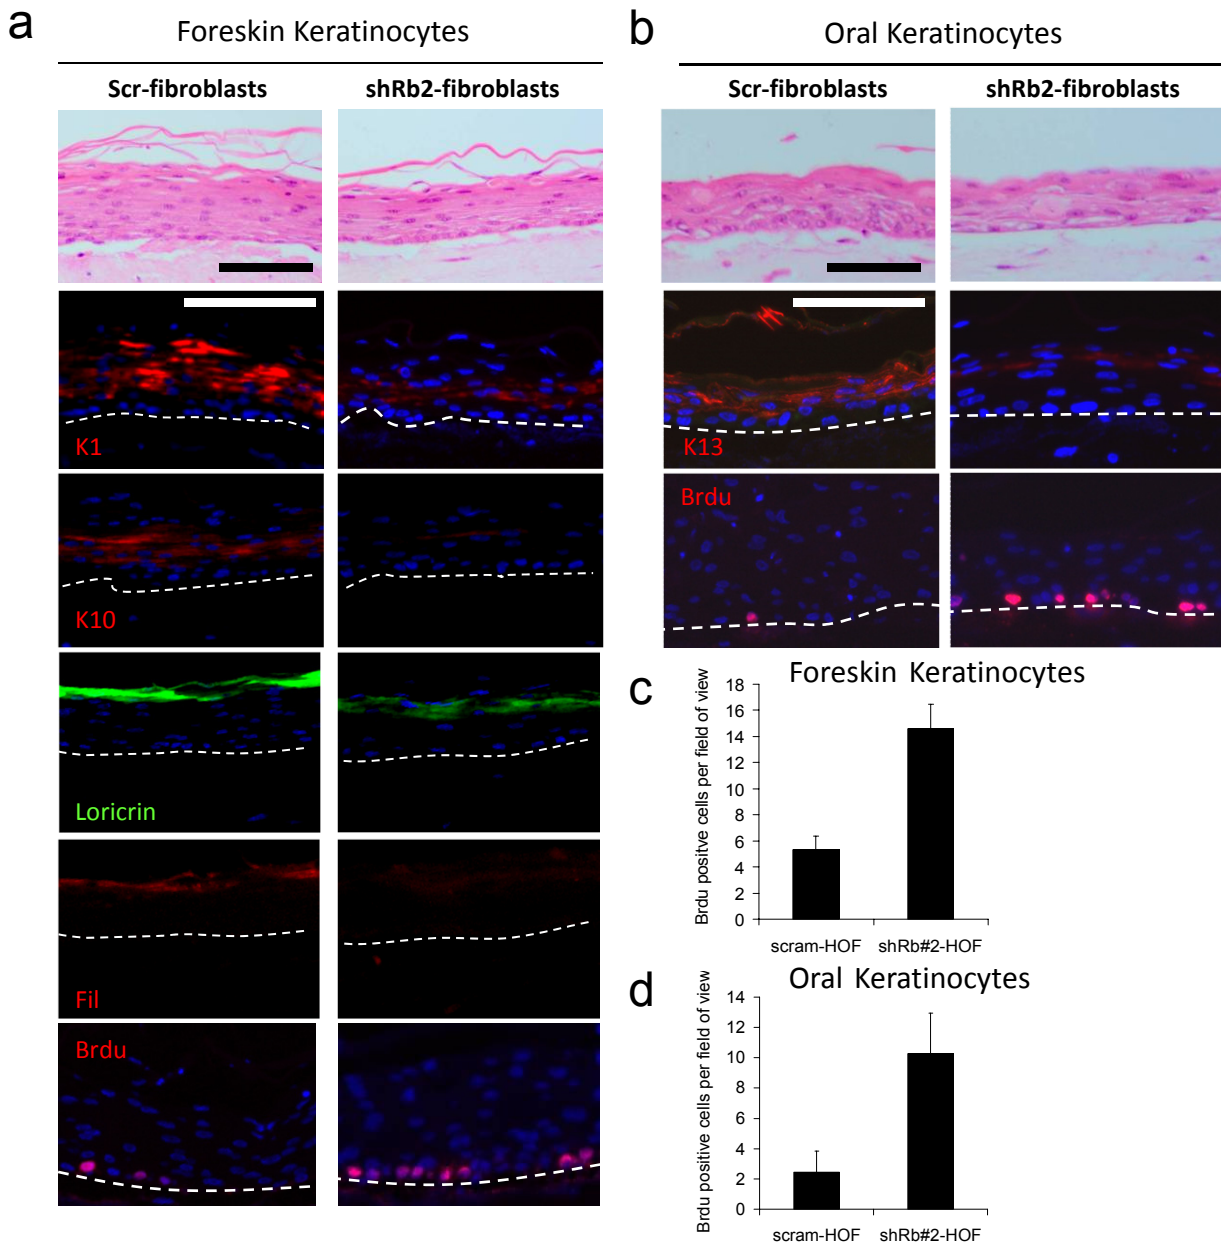

**Supplemental Figure 1:** Rb-depletion in human oral fibroblasts (HOFs) results in loss of differentiation and enhanced proliferation. Organotypic cultures of Rb-depleted HOFs and either foreskin keratinocytes (A) or adult oral keratinocytes (B) resulted in a poorly differentiated epithelium as identified by reduced staining of various differentiation markers. C) and D) Detection of Brdu incorporation to assess proliferation showed that epithelial cells cultured with Rb-depleted fibroblasts have enhanced proliferation in foreskin and oral keratinocytes, respectively.

## Supplemental Figure 2

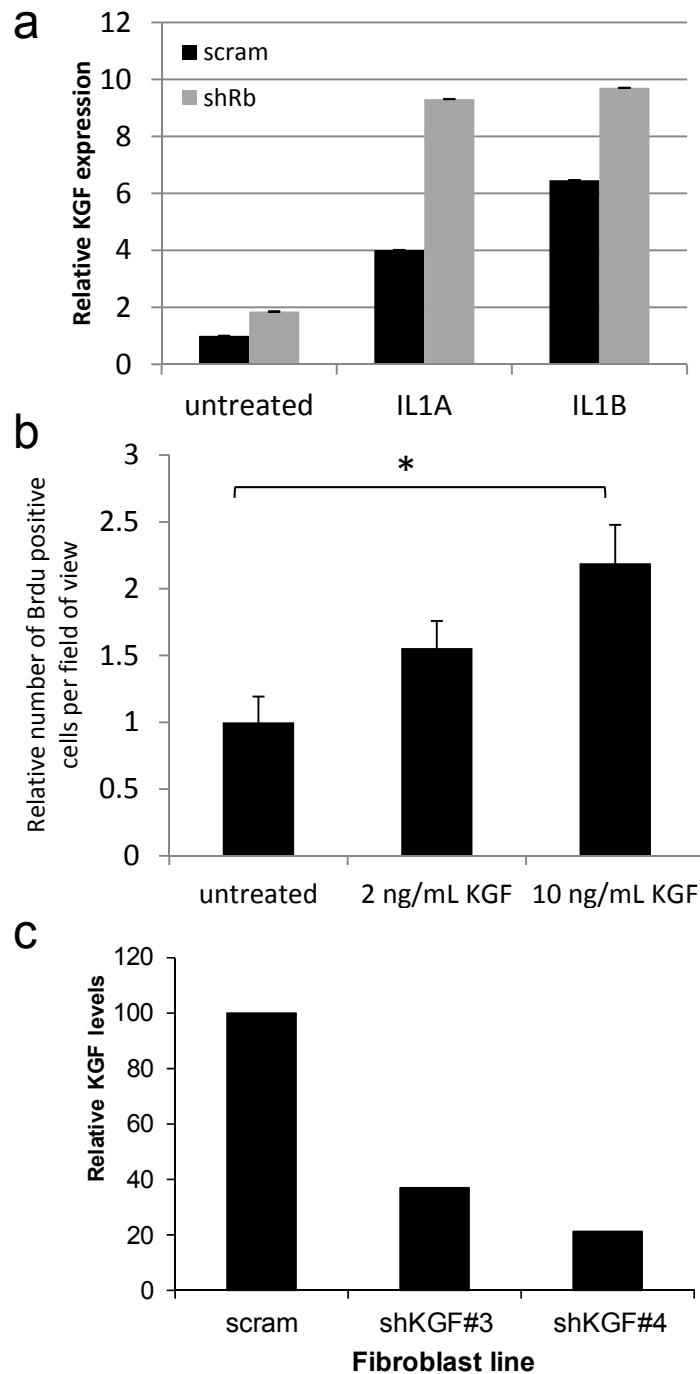

**Supplemental Figure 2:** A) Relative expression of KGF in scrambled control and Rb-depleted fibroblasts following treatment with 10 ng/mL IL1A and IL1B for 24 hours. B) Assessment of Brdu incorporation by immunofluorescence indicated enhanced proliferation in organotypic cultures treated with KGF. \* indicates p<0.05 in a Student's T-test from three independent experiments. C) ELISA detection of KGF within the medium of KGF depleted fibroblasts compared to scrambled control fibroblasts. shRNA molecules 3 and 4 were used in this study as these resulted in 60-80% reduction in secreted KGF levels.

**Supplemental Table 1:** Primers used in this study.

| <b>cDNA</b> | <b>Direction</b>     | <b>Sequence</b>                                                |
|-------------|----------------------|----------------------------------------------------------------|
| Rb          | Forward:<br>Reverse: | 5'-ATCACAGCGATACAAACTTGGAG-3'<br>5'-AGCACAGCGATACAAACTTGGAG-3' |
| IL1A        | Forward:<br>Reverse: | 5'-ATCCTTCTATCATGTAAGCTATGG-3'<br>5'-TCCTCTGAGTCATTGGCGAT-3'   |
| IL1B        | Forward:<br>Reverse: | 5'-GGCGGCATCCAGCTACGAAT-3'<br>5'-CCTGGAGGTGGAGAGCTTTCAGTT-3'   |
| KGF         | Forward:<br>Reverse: | 5'-CACAATGGATACTGACATGGA-3'<br>5'-TCACTCTTATATCCCCTCCTTC-3'    |
| GAPDH       | Forward:<br>Reverse: | 5'-ATGGTGAAGGTCGGTGTGAA-3'<br>5'-ATGACAAGCTTCCCATTCTG-3'       |
| RPLPO       | Forward:<br>Reverse: | 5'-ATCAACGGGTACAAACGAGTC-3'<br>5'-CAGATGGATCAGCCAAGAAGG-3'     |
